# Supplementary material for: Amino Acids in the Uterine Luminal Fluid Reflects the Temporal Changes in Transporter Expression in the Endometrium and Conceptus during Early Pregnancy in Cattle
Source: PLoS One. 2014 Jun 24;9(6):e100010. doi: 10.1371/journal.pone.0100010 (PMC4069017; doi:10.1371/journal.pone.0100010)
Supplement: Table S1 — Primer information used for quantitative real time PCR analysis of candidate genes. All primers were used at a concentration of 300 nM in a final reaction volume of 15 µl. A dissociation curve was included to ensure specificity of each primer pair. (XLSX) [file pone.0100010.s001.xlsx]

## Sheet: Sheet1
Table S1. Primer information used for quantitative real time PCR analysis of candidate genes. All primers were used at a concentration of 300 nM in a final reaction volume of 15 µl. A dissociation curve was included to ensure specificity of each primer pair.
Gene Name	Gene Description	Acession number	Forward Primer (300 nM)	Reverse Primer (300 nM)	Product size (bp)
ACTB	Actin, beta	NM_173979.3	CGCCATGGATGATGATATTGC	AAGCCGGCCTTGCACAT	66
RPL19	Ribosomal protein L19	NM_001040516.1	GAAAGGCAGGCATATGGGTA	TCATCCTCCTCATCCAGGTT	86
SLC1A1	Solute carrier family 1 (neuronal/epithelial high affinity glutamate transporter, system Xag), member 1 [Bos taurus]	NM_174599.2	CACCGTCCTGAGTGGGCTTGC	CAGAAGAGCCTGGGCCATTCCC	115
SLC1A2	Solute carrier family 1 (glial high affinity glutamate transporter), member 2 [Bos taurus]	XM_614642	GGCATCCACTGAAGGTGCCAACA	GCCCCAGATGCCGTGGCTTT	101
SLC1A3	Solute carrier family 1 (glial high affinity glutamate transporter), member 3 [Bos taurus]	NM_174600	TCATGTGGTACGCCCCTCTGG	GCCAGCTGTCCCCCGATCAC	91
SLC1A4	Solute carrier family 1 (glutamate/neutral amino acid transporter), member 4 [Bos taurus]	NM_001081577.1	GAGGGGTCCTCACCATCGCCA	TGGTGGTGCGGTCCACAATCC	102
SLC1A5	Solute carrier family 1 (neutral amino acid transporter), member 5 [Bos taurus]	NM_174601.2	AACGGCACTCTGGTGAAGGTGC	CTTCCGCAGGGCCACACCAA	102
SLC38A11	Solute carrier family 38, member 11 [Bos taurus]	NM_001031760.1	TCATCCCGCCGCAGAGCCAT	ACGGCAGCAGACTGACGACAAG	91
SLC38A2	Solute carrier family 38, member 2 [Bos taurus]	NM_001082424.1	GAACCCAGACCACCAAGGCAG	GTTGGGCAGCGGGAGGAATCG	99
SLC38A3	Solute carrier family 38, member 3 [Bos taurus]	NM_001040486.1	CGAGGCCAGACGTCCGACAG	TGCAGAGGTGCCTCCATGGCT	82
SLC38A4	Solute carrier family 38, member 4 [Bos taurus]	NM_001205943.1	AACTCCAGGACGGCCTATGCAA	GCATCTTCCTCCGGGACCGA	109
SLC38A5	Solute carrier family 38, member 5 [Bos taurus]	NM_001015580.1	TGGCCATCTCGTCTGCTGAGGG	GCTCCTGCTCCACAGCATTCCC	84
SLC38A7	Solute carrier family 38, member 7 [Bos taurus]	NM_001100355.1	CGGCAGCCCGAGGTGAAGAC	GCCGCAGATACCTGTGCCCAT	90
SLC43A2	Solute carrier family 43, member 2 [Bos taurus]	NM_001075546.1	TGCTGGGCAGTGCCTGCTTT	AGCCATTCAGAGCCAGGGCGA	108
SLC6A14	Solute carrier family 6 (amino acid transporter), member 14 [Bos taurus]	NM_001098461.1	TCGAGGGGCAACTCTGGAAGGT	GGCAGCATCTTTCCAAACCTCAGCA	106
SLC6A18	Solute carrier family 6, member 18 [Bos taurus]	NM_001102113.1	GAGCTGCGTGGGCTTCGCTG	AAGGCACCTCCCCCATGCGTC	81
SLC6A19	Solute carrier family 6 (neutral amino acid transporter), member 19 [Bos taurus]	XM_003583712.1	ACGTGGGACAACAAGGCGCA	TGGCTCTGGCACAGGTAGGGG	95
SLC7A1	Solute carrier family 7 (cationic amino acid transporter, y+ system), member 1 [Bos taurus]	NM_001135792.1	GACAAGGGCACGTGGGTCCG	AGTCCTTGAGGGGTCGGCGG	117
SLC7A10	Solute carrier family 7 (neutral amino acid transporter light chain, asc system), member 10 [Bos taurus]	NM_001104989.1	TCACTGCCCTGGGCTCACTCT	CCAGAGCAGCAGGAAGCCAGC	119
SLC7A11	Solute carrier family 7 (anionic amino acid transporter light chain, xc- system), member 11 [Bos taurus]	XM_003583290.1	GGACCTCCGCAGGCCTCAGT	TCTGGATCCGGGCGCTCCAA	101
SLC7A2	Solute carrier family 7 (cationic amino acid transporter, y+ system), member 2 [Bos taurus]	XM_865568.3	CTGCAAGTGCCAGGGACCCAC	GGTTGCAGCCCCAGCCAAAGT	104
SLC7A3	Solute carrier family 7 (cationic amino acid transporter, y+ system), member 3 [Bos taurus]	NM_001078019.1	GTAGCCCCAACCCAACTCGGC	TGCTAGGAAGGATCGAGGAGCTGT	98
SLC7A4	Solute carrier family 7 (orphan transporter), member 4 [Bos taurus]	NM_001192042.1	CACCTTCCAGATGCCCCTGGTG	TGAAGCGCACCCAGGTCAGG	101
SLC7A5	Solute carrier family 7 (amino acid transporter light chain, L system), member 5 [Bos taurus]	NM_174613.2	GCTGGTGGTTTGGGCCGTGT	GTAGTCGCCGCCCGACTTGG	97
SLC7A6	Solute carrier family 7 (amino acid transporter light chain, y+L system), member 6 [Bos taurus]	NM_001075937.2	GCCTCAGCGGGCCACAGAAA	GCACGCCCTTGGGTGAAACG	119
SLC7A7	Solute carrier family 7 (amino acid transporter light chain, y+L system), member 7 [Bos taurus]	NM_001075151.1	GGCCAGGGAGCCTCGACTCA	AGCCGAGTACAGTGCCAGAGCA	87
SLC7A8	Solute carrier family 7 (amino acid transporter light chain, L system), member 8 [Bos taurus]	NM_001192889.1	CCTCCTCCCGGCTGTTCTTTGC	GAGCAAGGCTGGGATGGGGGT	101
SLC7A9	Solute carrier family 7 (glycoprotein-associated amino acid transporter light chain, bo,+ system), member 9 [Bos taurus]	NM_001035054.1	CAGGCTGTGGCCGTGACGTT	AGCGGCGCCGATGGTTGAAA	93
